# Supplementary material for: Biomimetic immunomagnetic gold hybrid nanoparticles coupled with inductively coupled plasma mass spectrometry for the detection of circulating tumor cells
Source: Royal Society of Chemistry journal article supplement (doi:10.1039/d0tb00403k), 2020-01-01
Supplement: d0tb00403k1.pdf [file d0tb00403k1.pdf]

# **Biomimetic Immunomagnetic Gold Hybrid Nanoparticles Coupled with Inductively Coupled Plasma Mass Spectrometry for the Detection of Circulating Tumor Cells**

Zhi-min Chang<sup>a,b</sup>, Hang Zhou<sup>c</sup>, Chao Yang<sup>d</sup>, Rui Zhang<sup>b</sup>, Qiannan You<sup>b</sup>, Ruhong Yan<sup>b</sup>,  
Li Li<sup>b</sup>, Mingfeng Ge<sup>b</sup>, Yuguo Tang<sup>a,b</sup>, Wen-fei Dong<sup>b,\*</sup> and Zheng Wang<sup>b,\*</sup>

<sup>a</sup> Academy for Engineering & Technology, Fudan University, Shanghai 200433, China.

<sup>b</sup> CAS Key Laboratory of Bio-Medical Diagnostics, Suzhou Institute of Biomedical Engineering and Technology, Chinese Academy of Sciences, Suzhou 215163, China.

<sup>c</sup> Department of Ultrasound, The Second Affiliated Hospital, Zhejiang University School of Medicine, Hangzhou 310000, P.R. China

<sup>d</sup> Institutes of Life Sciences, School of Biomedical Sciences and Engineering and National Engineering Research Center for Tissue Restoration and Reconstruction, South China University of Technology, Guangzhou International Campus, Guangzhou, Guangdong 510006, China.

\* Corresponding author.

Suzhou Institute of Biomedical Engineering and Technology (SIBET), Chinese Academy of Sciences (CAS), 88 Keling RD, Suzhou, Jiangsu, China, 215163

Tel: +86-512-6958-8307

Fax: +86-512-6958-8088

E-mail addresses: wangz@sibet.ac.cn (Z. Wang), wenfeidong@sibet.ac.cn (W.-F. Dong)

## **Materials and Reagents**

The chemicals iron (III) chloride anhydrous ( $\text{FeCl}_3$ ), Tetrachloroauric acid ( $\text{HAuCl}_4 \cdot 3\text{H}_2\text{O}$ ), polyacrylic acid (PAA), diethylene glycol (DEG), 3-Mercaptopropyltrimethoxysilane (MPTMS, 95%), Hoechst 33258, and Sulforhodamine B (SRB) were bought from the Sigma-Aldrich Co. (St Louis, MO, USA). The antibody of epithelial cell adhesion molecule (EpCAM) (PE594 labeled) was obtained from Novus Biologicals. Phycoerythrin-conjugated anti-cytokeratin (PE-anti-CK) and fluorescein isothiocyanate-conjugated anti-human CD45 (FITC-anti-CD45) were purchased from BD Biosciences (USA).

## **Characterization**

Transmission electron microscopy (TEM) images were obtained with a JEM-2100F transmission electron microscope (JEOL Ltd, Japan) with a 200 kV voltage. The size of nanoparticles was measured on a Zeta PALS + BI-90Plus system. Magnetic properties were measured by VSM at 300 K. The UV-visible absorption spectra were obtained on a U-3310 spectrophotometer (Hitachi, Japan).

### Figure Caption

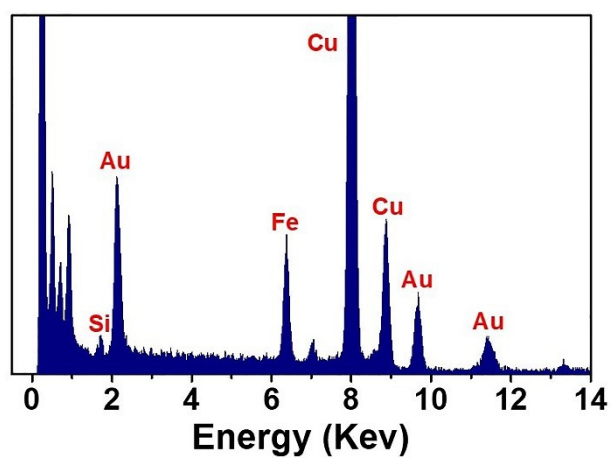

**Figure S1.** The energy-dispersive X-ray spectrum of  $\text{Fe}_3\text{O}_4@\text{Au}$ .

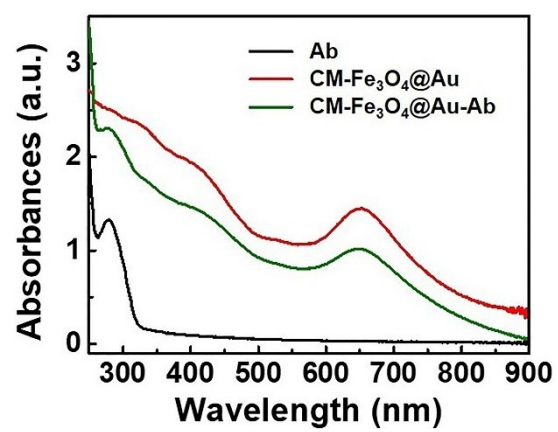

**Figure S2.** UV-vis-NIR spectra of Ab, CM-Fe<sub>3</sub>O<sub>4</sub>@Au and CM-Fe<sub>3</sub>O<sub>4</sub>@Au-Ab.

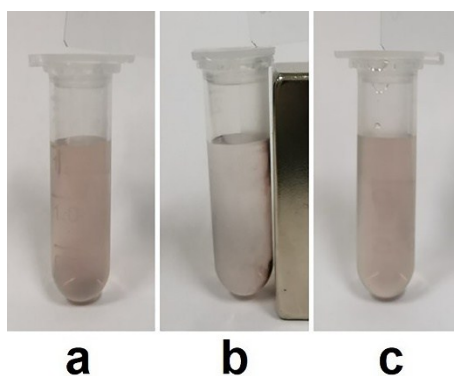

**Figure S3.** Photographs of CM-Fe<sub>3</sub>O<sub>4</sub>@Au-Ab before (a) and after (b) magnetic separation and the removal (c) of the extra magnet.

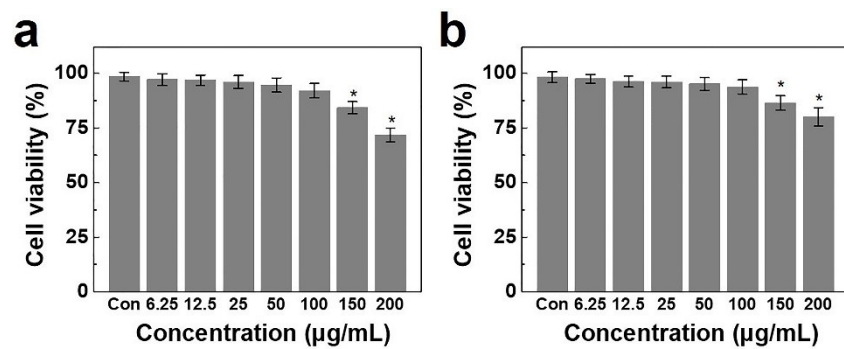

**Figure S4.** Cytotoxicity of various concentrations of CM-Fe<sub>3</sub>O<sub>4</sub>@Au-Ab towards MCF-7 cells (a) and leukocytes (b). Data represent the mean  $\pm$  s.d. (n = 6). \*P < 0.05 vs con.

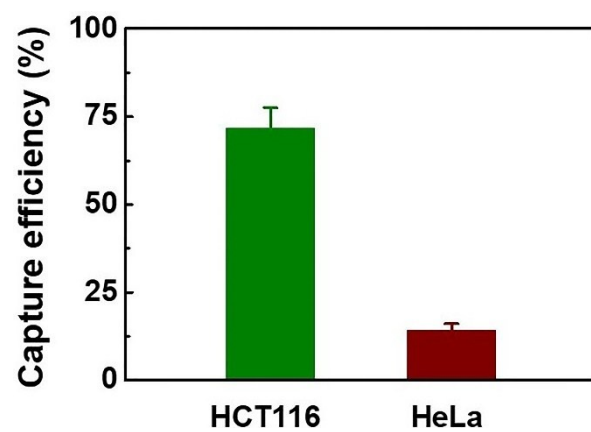

**Figure S5.** The capture efficiency of HCT116 cells and HeLa cells in PBS by CM- $\text{Fe}_3\text{O}_4@\text{Au}-\text{Ab}$ .
